# Supplementary material
Source: PubMed Central journal article supplement (PMC2996875)
Supplement: NIHMS227864-supplement-1_si_001.pdf [file NIHMS227864-supplement-1_si_001.pdf]

**Supporting Material to**

"All-atom Multiscale Simulation of CCMV Capsid Swelling" by  
Yinglong Miao, John Johnson, and Peter Ortoleva

## Figures

**Fig. S1** Time courses of the CCMV capsid diameter as simulated at pH 7.0 (sim2), pH5.0 (sim4), and pH 5.0 with 0.05M MgCl<sub>2</sub> (sim5).

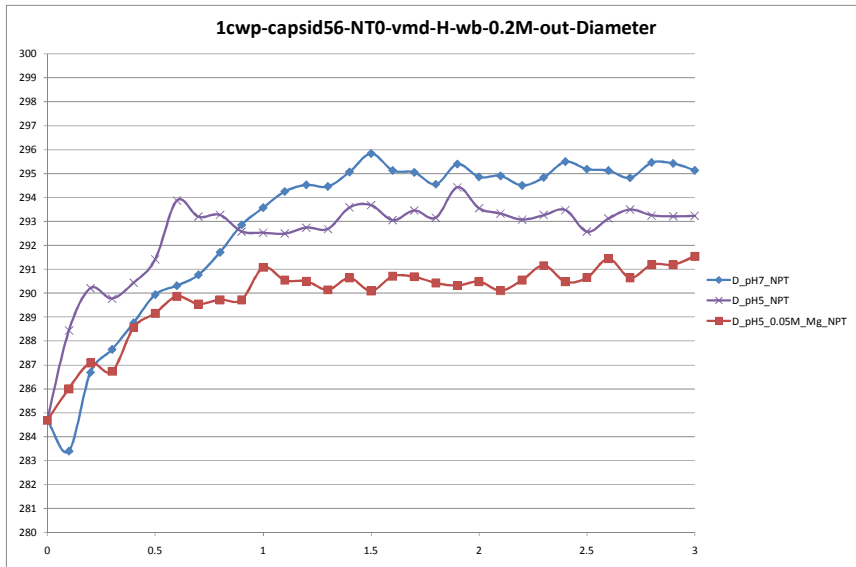

**Fig. S2** Time courses of the CCMV capsid outer radius as simulated at pH 7.0 (sim2), pH5.0 (sim4), and pH 5.0 with 0.05M MgCl<sub>2</sub> (sim5).

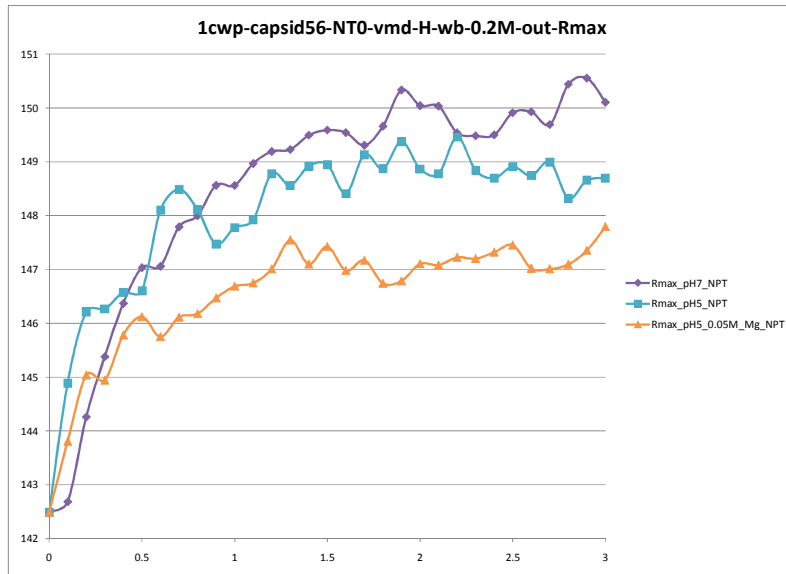

**Fig. S3** Time courses of the CCMV capsid average radius as simulated at pH 7.0 (sim2), pH5.0 (sim4), and pH 5.0 with 0.05M MgCl<sub>2</sub> (sim5).

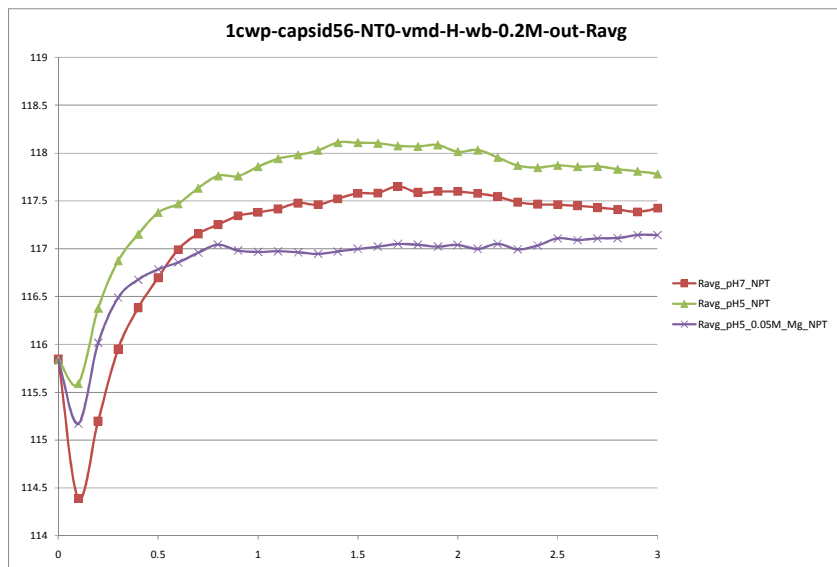

**Fig. S4** The number of  $Mg^{2+}$  ions that diffuse into CCMV capsid during the simulation at pH 5.0 with 0.05M  $MgCl_2$  (sim5).

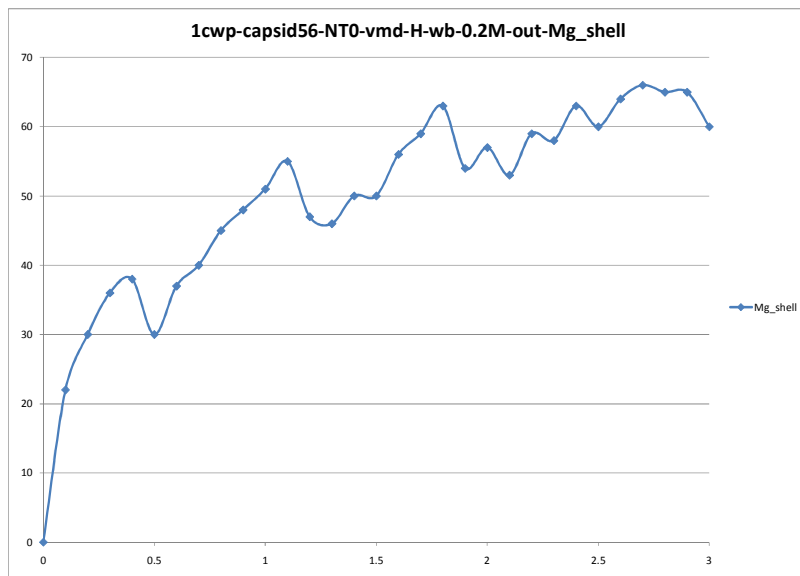

**Fig. S5** (a) Schematic representation of a divalent cation inter-protein binding site in CCMV capsid, which are composed of residues Glu81, Gln85, Lys84 and Glu148 from a protein and Gln149\* and Asp153\* from its adjacent protein. (b) Time courses of the distances between Mg<sup>2+</sup> ion in the center and its ligand atoms during the simulation at pH 5.0 with 0.05M MgCl<sub>2</sub> (sim5).

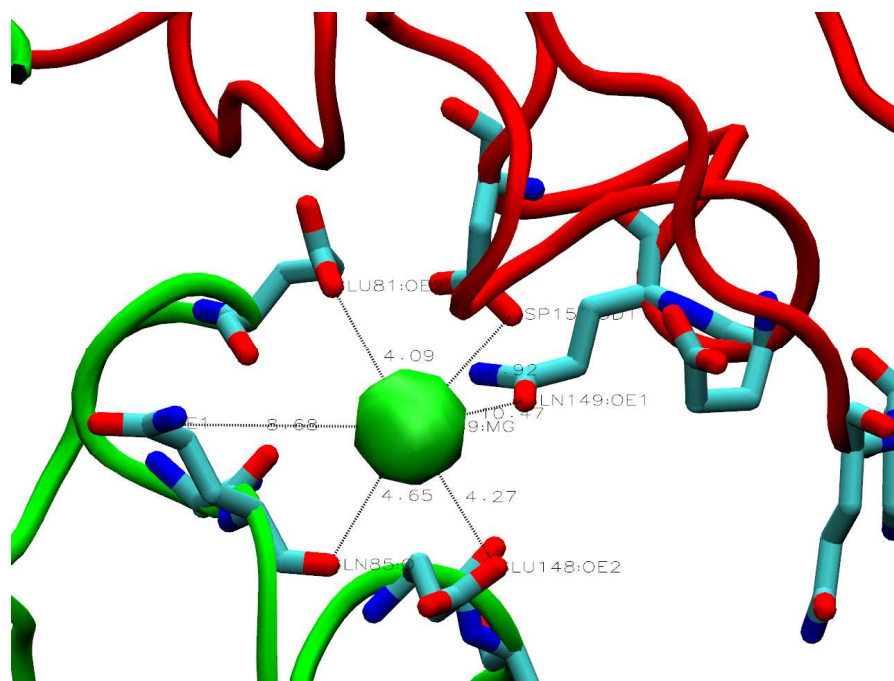

(a)  
Mg binding

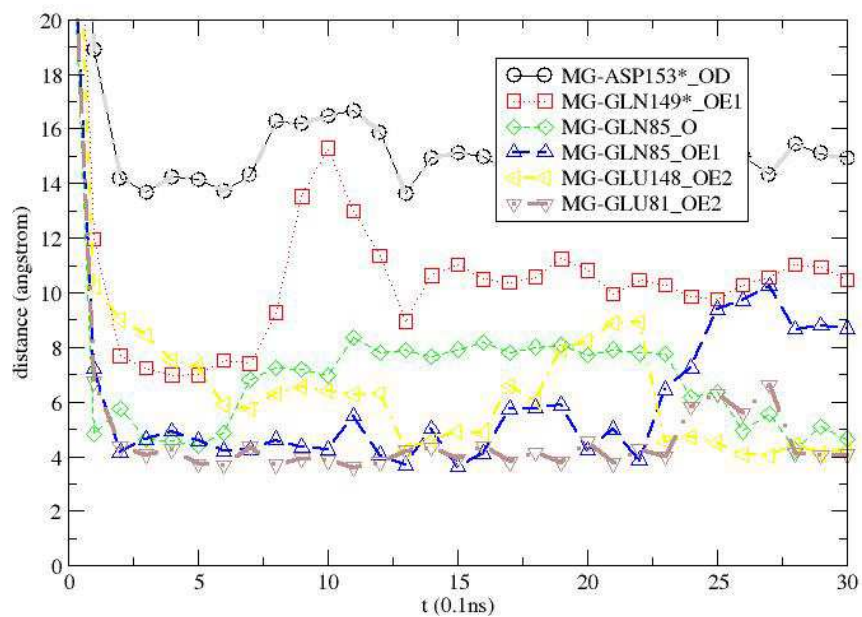

(b)
